# Supplementary material for: In situ synthesis of nickel tiara-like clusters with two different thiolate bridges
Source: Royal Society of Chemistry journal article supplement (doi:10.1039/c2dt30524k), 2012-01-01
Supplement: c2dt30524k.pdf [file c2dt30524k.pdf]

## Supplementary Information

### **In situ synthesis of nickel tiara-like clusters with two different thiolate bridges**

**Chunhong Tan,<sup>a,b</sup> Meiliang Jin,<sup>a,b</sup> Xiao Ma,<sup>a,b</sup> Qilong Zhu,<sup>a,b</sup> Yihui Huang,<sup>a,b</sup> Yanlong Wang,<sup>a,b</sup> Shengmin Hu,<sup>a</sup> Tianlu Sheng\*<sup>a</sup> and Xintao Wu<sup>a</sup>**

<sup>a</sup> State Key Laboratory of Structure Chemistry, Fujian Institute of Research on the Structure of Matter, Chinese Academy of Sciences, Fuzhou, 350002, China.

<sup>b</sup> Graduate School of the Chinese Academy of Sciences, Beijing, 100049, China.

- Corresponding author:  
E-mail: *tsheng@fjirsm.ac.cn*.  
Tel: +86-591-83792294; Fax: +86-591-83719238

**Scheme S1.** Mechanism of the in situ syntheses of methanethiol (the same goes for ethanethiol).

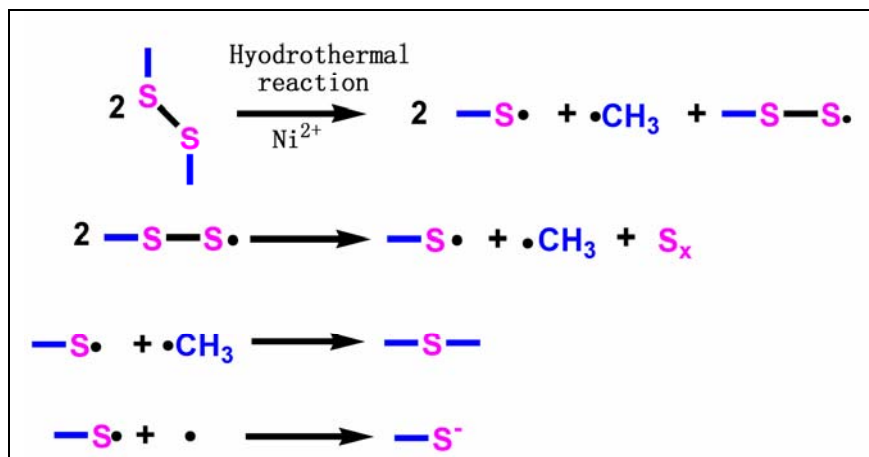

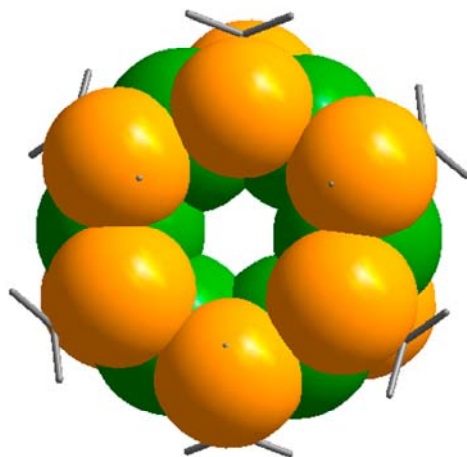

**Fig. S1** Molecular view of **1** in space filling model. The hydrogen atoms are omitted for clarity (Ni green, S yellow, C gray).

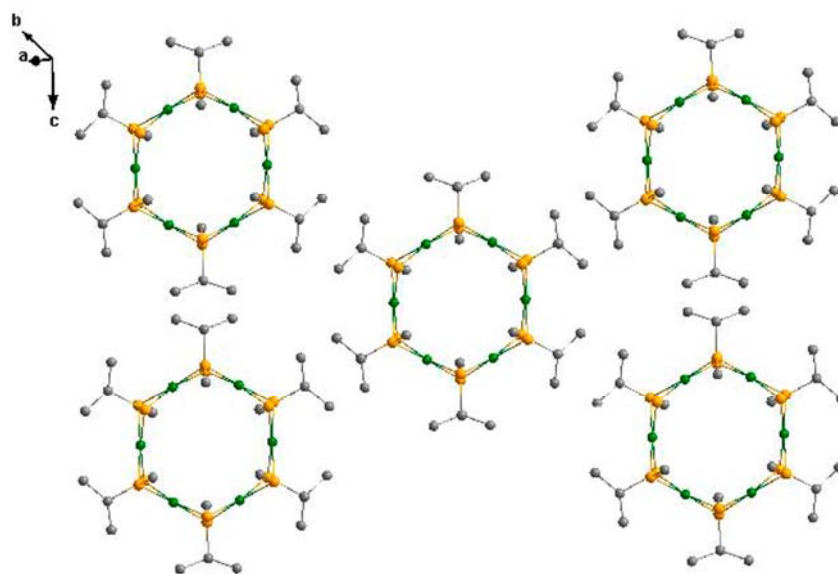

**Fig. S2** Crystal packing pattern of **1**. The hydrogen atoms are omitted for clarity (Ni green, S yellow, C gray).

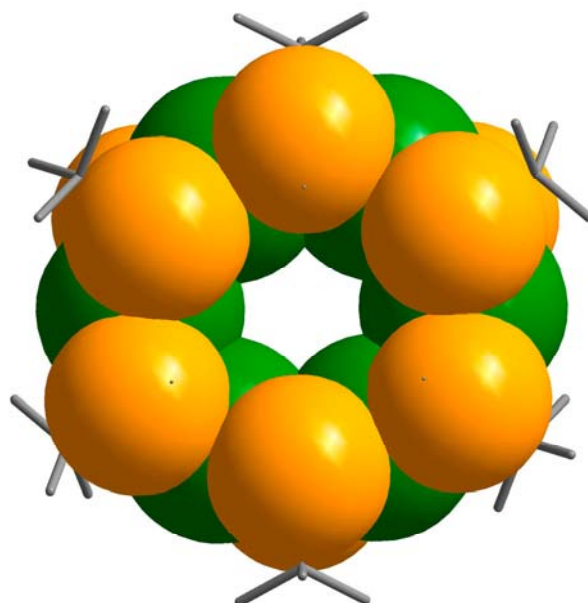

**Fig. S3** Molecular view of **2** in space filling model. The hydrogen atoms are omitted for clarity (Ni green, S yellow, C gray).

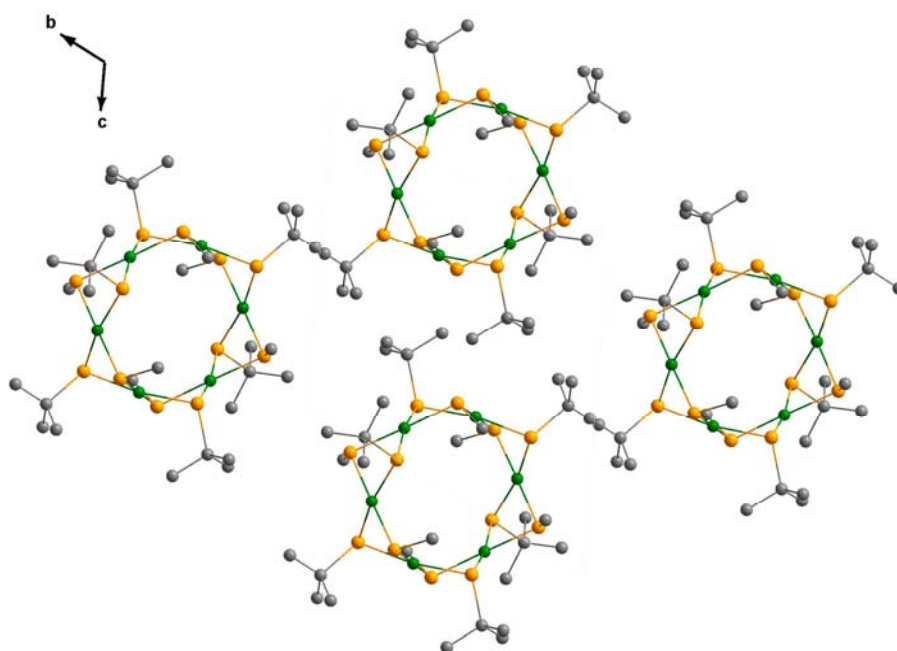

**Fig. S4** Crystal packing pattern of **2**. The hydrogen atoms are omitted for clarity (Ni green, S yellow, C gray).

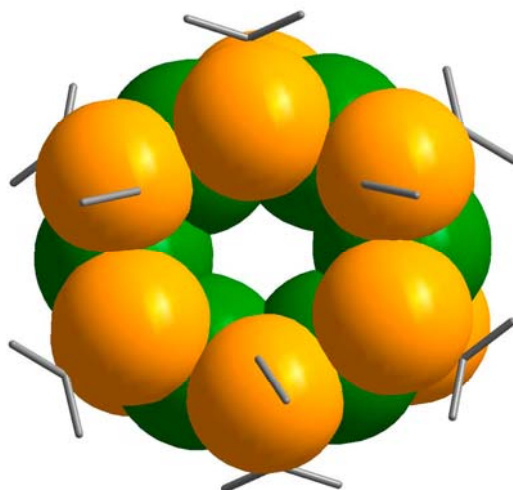

**Fig. S5** Molecular view of **3** in space filling model. The hydrogen atoms and the distorted carbon are omitted for clarity (Ni green, S yellow, C gray).

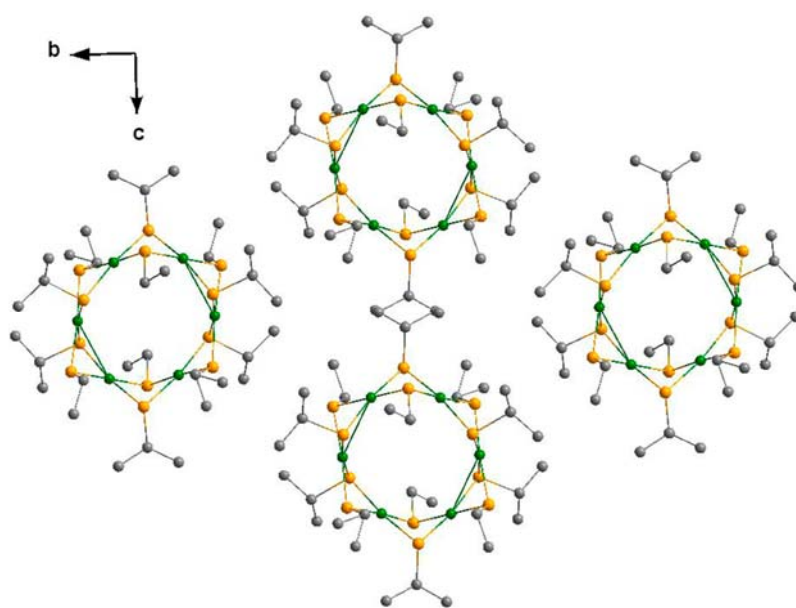

**Fig. S6** Crystal packing pattern of **3**. The hydrogen atoms are omitted for clarity (Ni green, S yellow, C gray).

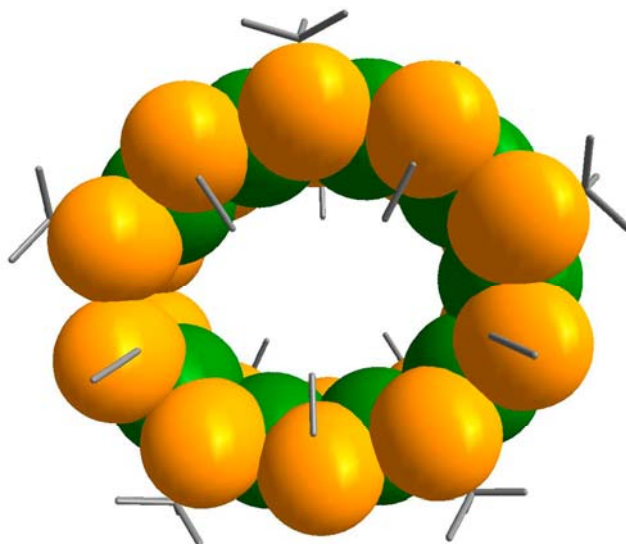

**Fig. S7** Molecular view of **4** in space filling model. The hydrogen atoms and the distorted carbon are omitted for clarity (Ni green, S yellow, C gray).

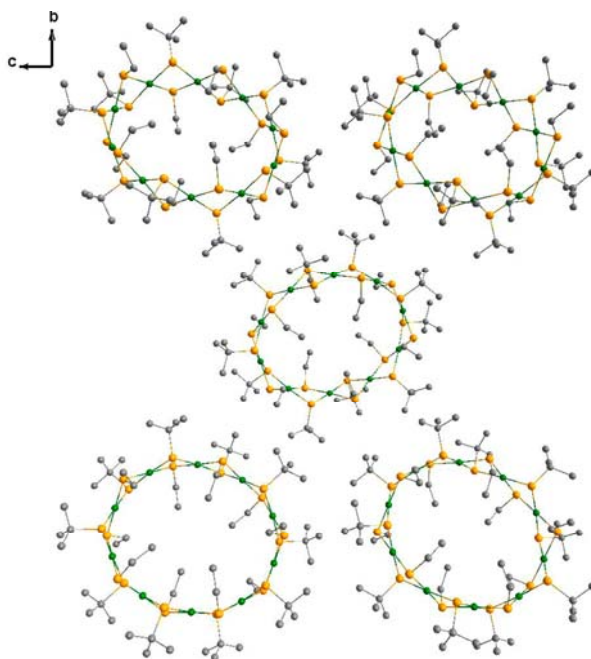

**Fig. S8** Crystal packing pattern of **4**. The hydrogen atoms are omitted for clarity (Ni green, S yellow, C gray).

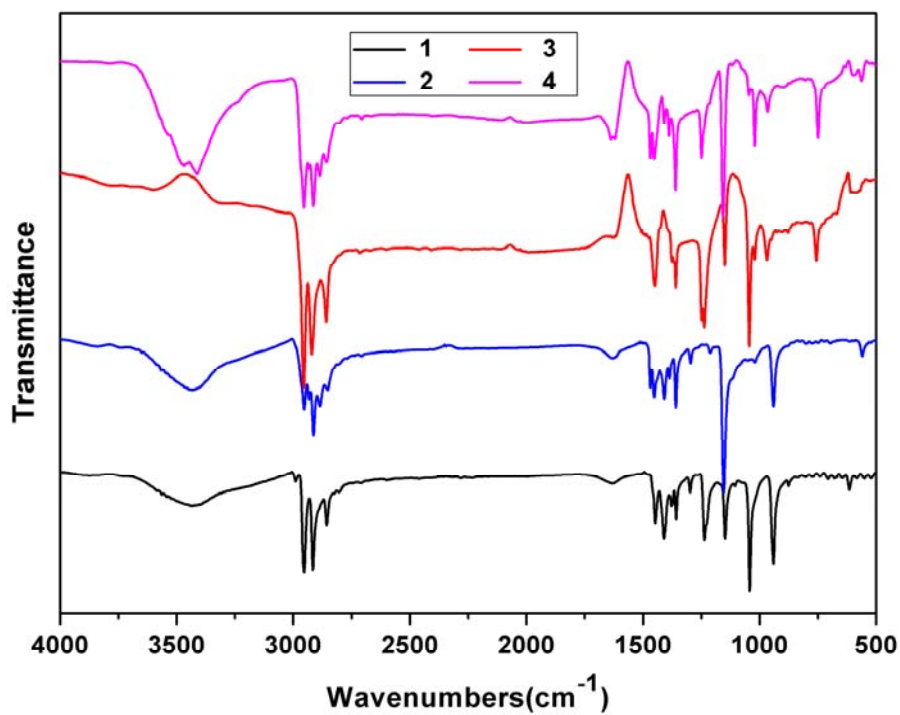

**Fig. S9** IR spectra of compounds **1**, **2**, **3** and **4**.

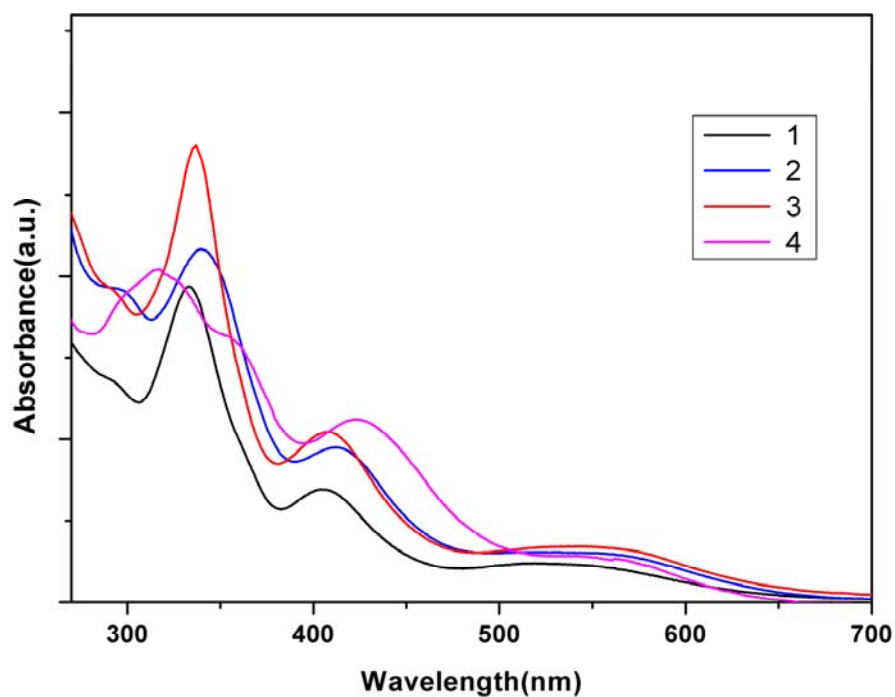

**Fig. S10** UV-vis-NIR spectra of compounds **1**, **2**, **3** and **4**.

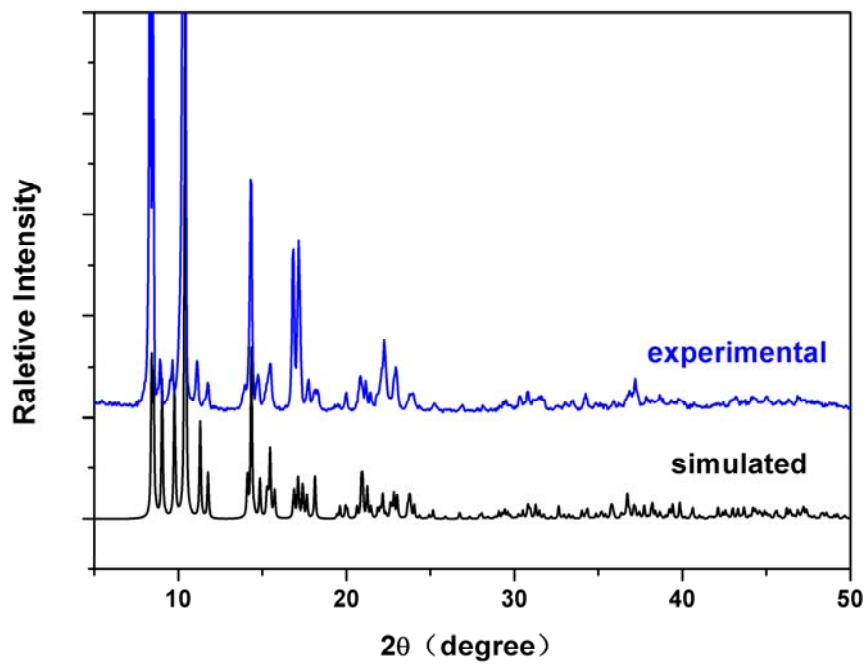

**Fig. S11** Powder X-ray diffractions for simulated and experimental 1.

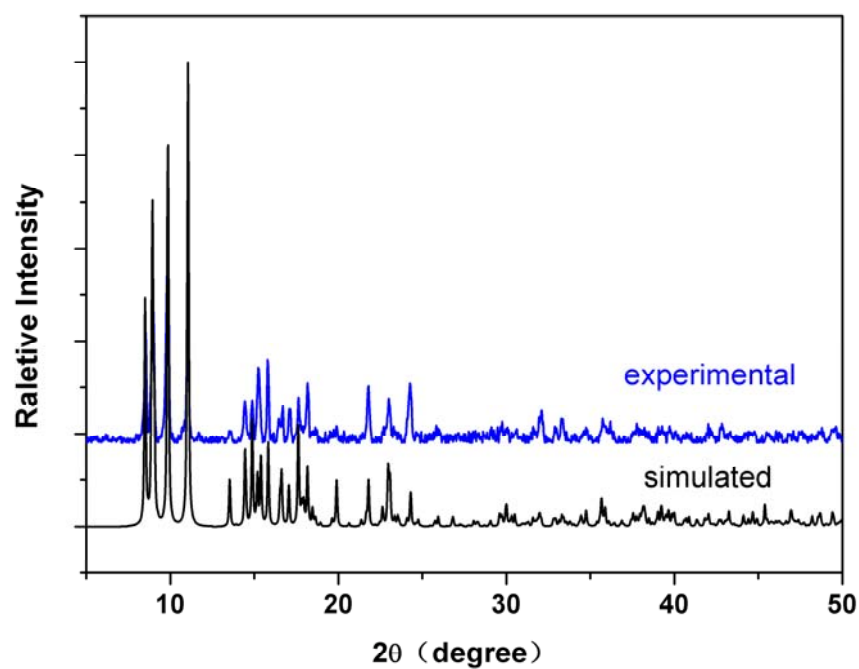

**Fig. S12** Powder X-ray diffractions for simulated and experimental 2.



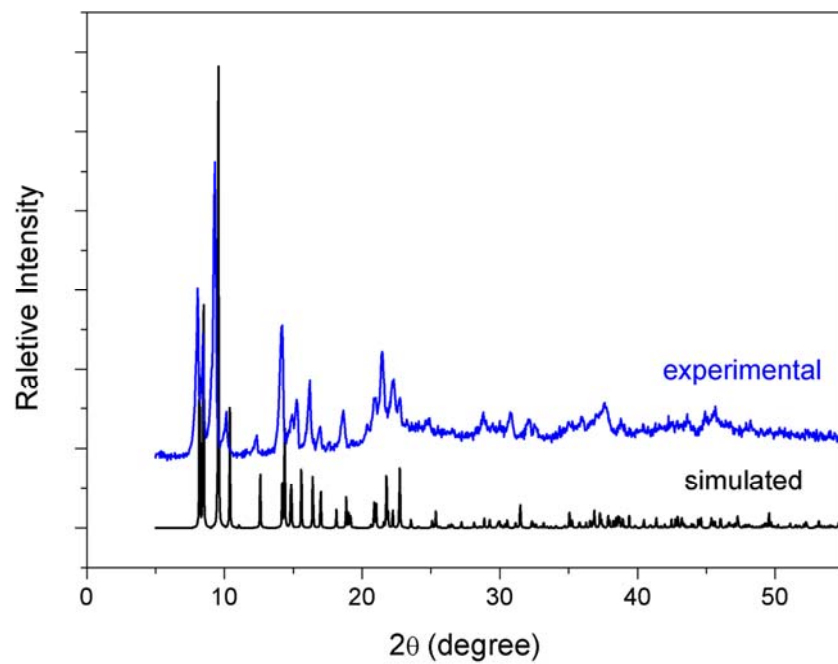

**Fig. S13** Powder X-ray diffractions for simulated and experimental **3**.

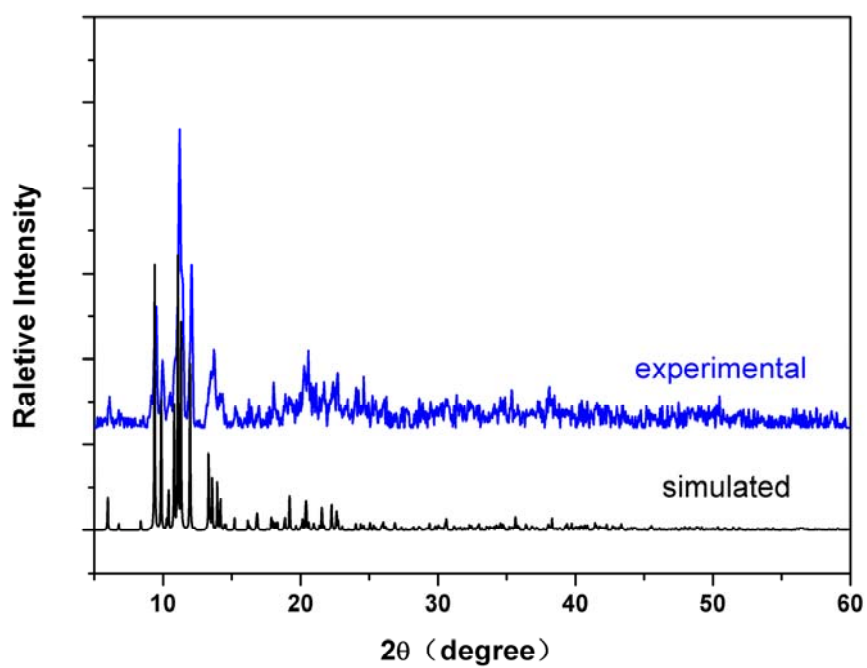

**Fig. S14** Powder X-ray diffractions for simulated and experimental **4**.

**Table S1** The selected bond length (Å) and angles (deg.) for complexes **1**.

|                     |            |                        |           |
|---------------------|------------|------------------------|-----------|
| Ni (1)–S (5) #1     | 2.194 (3)  | Ni (3)–S (5)           | 2.190 (3) |
| Ni (1)–S (1)        | 2.195 (3)  | Ni (3)–S (6)           | 2.211 (3) |
| Ni (1)–S (6) #1     | 2.209 (3)  | Ni (3)–S (4)           | 2.211 (3) |
| Ni (1)–S (2)        | 2.211 (3)  | S (5)–Ni (1) #1        | 2.194 (3) |
| Ni (2)–S (3)        | 2.192 (3)  | S (6)–Ni (1) #1        | 2.209 (3) |
| Ni (2)–S (1)        | 2.197 (3)  | Ni (1)–Ni (3) #1       | 2.923 (3) |
| Ni (2)–S (4)        | 2.211 (3)  | Ni (1)–Ni (2)          | 2.955 (2) |
| Ni (2)–S (2)        | 2.214 (3)  | Ni (2)–Ni (3)          | 2.917 (2) |
| Ni (3)–S (3)        | 2.189 (3)  | Ni (3)–Ni (1) #1       | 2.923 (3) |
|                     |            |                        |           |
| Ni (1)–S (1)–Ni (2) | 84.52 (11) | Ni (3)–S (4)–Ni (2)    | 82.51 (8) |
| Ni (1)–S (2)–Ni (2) | 83.79 (11) | Ni (3)–S (5)–Ni (1) #1 | 83.60 (9) |
| Ni (3)–S (3)–Ni (2) | 83.46 (10) | Ni (1) #1–S (6)–Ni (3) | 82.79 (7) |

Symmetry transformations used to generate equivalent atoms:  
#1  $-x, -y+1, -z$

**Table S2** The selected bond length (Å) and angles (deg.) for complexes **2**.

|                     |           |                        |            |
|---------------------|-----------|------------------------|------------|
| Ni (1)–S (5) #1     | 2.190 (2) | Ni (3)–S (5)           | 2.201 (29) |
| Ni (1)–S (6) #1     | 2.202 (2) | Ni (3)–S (6)           | 2.199 (2)  |
| Ni (1)–S (1)        | 2.202 (2) | Ni (3)–S (3)           | 2.201 (2)  |
| Ni (1)–S (2)        | 2.208 (2) | S (5)–Ni (1) #1        | 2.190 (2)  |
| Ni (2)–S (4)        | 2.197 (2) | S (6)–Ni (1) #1        | 2.201 (2)  |
| Ni (2)–S (1)        | 2.200 (2) | Ni (3)–S (4)           | 2.1944 (2) |
| Ni (2)–S (3)        | 2.200 (2) | Ni (1)–Ni (2)          | 2.887 (3)  |
| Ni (2)–S (2)        | 2.208 (2) | Ni (2)–Ni (3)          | 3.006 (4)  |
|                     |           |                        |            |
| Ni (2)–S (1)–Ni (1) | 82.00 (7) | Ni (3)–S (4)–Ni (2)    | 84.46 (7)  |
| Ni (1)–S (2)–Ni (2) | 81.72 (6) | Ni (1) #1–S (5)–Ni (3) | 86.47 (7)  |
| Ni (2)–S (3)–Ni (3) | 84.20 (6) | Ni (3)–S (6)–Ni (1) #1 | 86.22 (7)  |

Symmetry transformations used to generate equivalent atoms:  
#1  $-x+1, -y+1, -z$

**Table S3** The selected bond length (Å) and angles (deg.) for complexes **3**.

|                       |           |                       |           |
|-----------------------|-----------|-----------------------|-----------|
| Ni (1)–S (2)          | 2.192 (3) | S (3)–Ni (3)#1        | 2.194 (2) |
| Ni (1)–S (6)          | 2.197 (3) | S (4)–Ni (3)#1        | 2.216 (2) |
| Ni (1)–S (5)          | 2.202 (3) | Ni (3)–S (6)          | 2.195 (2) |
| Ni (1)–S (1)          | 2.212 (3) | Ni (3)–S (5)          | 2.212 (3) |
| Ni (2)–S (3)          | 2.194 (2) | Ni (3)–S (4)#1        | 2.216 (2) |
| Ni (2)–S (2)          | 2.197 (2) | Ni (1)–Ni (2)         | 2.860 (2) |
| Ni (2)–S (4)          | 2.208 (2) | Ni (2)–Ni (3)         | 2.882 (2) |
| Ni (2)–S (1)          | 2.214 (3) | Ni (3)–Ni (1)         | 3.035 (2) |
| Ni (3)–S (3)#1        | 2.194 (2) |                       |           |
|                       |           |                       |           |
| Ni (1)–S (1)–Ni (2)   | 80.49 (9) | Ni (2)–S (4)–Ni (3)#1 | 81.31 (9) |
| Ni (1)–S (2)–Ni (2)   | 81.30 (8) | Ni (1)–S (5)–Ni (3)   | 86.87 (9) |
| Ni (2)–S (3)–Ni (3)#1 | 82.11 (9) | Ni (3)–S (6)–Ni (1)   | 87.39 (9) |

Symmetry transformations used to generate equivalent atoms:  
#1 -x, -y-1, -z+1

**Table S4** The selected bond length (Å) and angles (deg.) for complexes **4**.

|                     |            |                        |            |
|---------------------|------------|------------------------|------------|
| Ni (1)–S (10)#1     | 2.199 (3)  | Ni (4)–S (5)           | 2.204 (3)  |
| Ni (1)–S (2)        | 2.202 (3)  | Ni (4)–S (6)           | 2.210 (3)  |
| Ni (1)–S (1)        | 2.206 (3)  | Ni (5)–S (10)          | 2.191 (3)  |
| Ni (1)–S (9)#1      | 2.213 (3)  | Ni (5)–S (8)           | 2.194 (3)  |
| Ni (2)–S (2)        | 2.190 (3)  | Ni (5)–S (7)           | 2.215 (3)  |
| Ni (2)–S (4)        | 2.193 (3)  | Ni (5)–S (9)           | 2.229 (3)  |
| Ni (2)–S (3)        | 2.207 (3)  | S (9)–Ni (1)#1         | 2.213 (3)  |
| Ni (2)–S (1)        | 2.214 (3)  | S (10)–Ni (1)#1        | 2.199 (3)  |
| Ni (3)–S (4)        | 2.197 (3)  | Ni (1)–Ni (2)          | 3.188 (3)  |
| Ni (3)–S (3)        | 2.200 (3)  | Ni (2)–Ni (3)          | 3.085 (1)  |
| Ni (3)–S (6)        | 2.206 (3)  | Ni (3)–Ni (4)          | 3.088 (3)  |
| Ni (3)–S (5)        | 2.207 (3)  | Ni (4)–Ni (5)          | 3.166 (2)  |
| Ni (4)–S (8)        | 2.192 (3)  | Ni (5)–Ni (1)#1        | 3.212 (3)  |
| Ni (4)–S (7)        | 2.195 (3)  |                        |            |
|                     |            |                        |            |
| Ni (1)–S (1)–Ni (2) | 92.30 (10) | Ni (3)–S (6)–Ni (4)    | 88.76 (10) |
| Ni (2)–S (2)–Ni (1) | 93.07 (10) | Ni (4)–S (7)–Ni (5)    | 91.74 (10) |
| Ni (3)–S (3)–Ni (2) | 88.85 (9)  | Ni (4)–S (8)–Ni (5)    | 92.41 (11) |
| Ni (2)–S (4)–Ni (3) | 89.30 (9)  | Ni (1)#1–S (9)–Ni (5)  | 92.60 (10) |
| Ni (4)–S (5)–Ni (3) | 88.88 (10) | Ni (5)–S (10)–Ni (1)#1 | 94.03 (10) |

Symmetry transformations used to generate equivalent atoms:  
#1 -x, -y+1, -z
